# Supplementary material
Source: PubMed Central journal article supplement (PMC7967082)
Supplement: jama-e2025879-s001.pdf [file jama-e2025879-s001.pdf]

## Supplemental Online Content

Zatoński WA, Zatoński M, Janik-Koncewicz K, Wojtyła A. Alcohol-related deaths in Poland during a period of weakening alcohol control measures. *JAMA*. Published March 16, 2021. doi:10.1001/jama.2020.25879

**eTable.** List of Causes of Death Wholly Attributable to Alcohol Consumption Included in the Analysis

This supplemental material has been provided by the authors to give readers additional information about their work.

**eTable. List of Causes of Death Wholly Attributable to Alcohol Consumption Included in the Analysis**

| Cause of death                                                | <i>ICD-10</i> code |
|---------------------------------------------------------------|--------------------|
| <b>Mental and behavioural disorders due to use of alcohol</b> | <b>F.10.x</b>      |
| Alcohol intoxication                                          | F10.0              |
| Harmful use of alcohol                                        | F10.1              |
| Alcohol dependence                                            | F10.2              |
| Alcohol withdrawal state                                      | F10.3              |
| Alcohol withdrawal state with delirium                        | F10.4              |
| Alcohol-induced psychotic disorder                            | F10.5              |
| Alcohol-induced amnestic disorder                             | F10.6              |
| Alcohol-induced residual and late onset psychotic disorder    | F10.7              |
| <b>Poisoning due to alcohol</b>                               |                    |
| Accidental poisoning by and exposure to alcohol               | X45                |
| Intentional self-poisoning by and exposure to alcohol         | X65                |
| Poisoning by and exposure to alcohol, undetermined intent     | Y15                |
| <b>Liver disorders due to alcohol</b>                         | <b>K70.x</b>       |
| Alcoholic fatty liver                                         | K70.0              |
| Alcoholic hepatitis                                           | K70.1              |
| Alcoholic fibrosis and sclerosis of liver                     | K70.2              |
| Alcoholic cirrhosis of liver                                  | K70.3              |
| Alcoholic hepatic failure                                     | K70.4              |
| Alcoholic liver disease, unspecified                          | K70.9              |
| <b>Gastrointestinal disorders due to alcohol</b>              |                    |
| Alcoholic gastritis                                           | K29.2              |
| Alcohol-induced acute pancreatitis                            | K85.2              |
| Alcohol-induced chronic pancreatitis                          | K86.0              |
| <b>Other disorders due to alcohol</b>                         |                    |
| Alcohol-induced pseudo-Cushing's syndrome                     | E24.4              |
| Degeneration of nervous system due to alcohol                 | G31.2              |
| Alcoholic polyneuropathy                                      | G62.1              |
| Alcoholic myopathy                                            | G72.1              |
| Alcoholic cardiomyopathy                                      | I42.6              |

**Sources:**

1. Rehm J, Baliunas D, Borges GLG, et al. The relation between different dimensions of alcohol consumption and burden of disease – an overview. *Addiction* 2010; 105(5): 817-843.
2. Roberts E, Morse R, Epstein S, et al. The prevalence of wholly attributable alcohol conditions in the United Kingdom hospital system: a systematic review, meta-analysis and meta-regression. *Addiction* 2019; 114(10): 1726-1737.

**Notes:**

1. Rehm et al. included in their list six additional health conditions wholly attributable to alcohol: foetal alcohol syndrome(Q86.0), foetus and newborn affected by maternal use of alcohol (P04.3), maternal care for (suspected) damage to foetus from alcohol (O.35.4), excess blood alcohol (R78.0), toxic effect of alcohol (T51), evidence of alcohol involvement determined by blood alcohol level (Y90). In our analysis these six conditions were excluded.
2. Data on alcohol-induced pseudo-Cushing's syndrome (E24.4) for both men and women, and on alcoholic myopathy for women were not available in Polish mortality database.
